# Supplementary material
Source: PubMed Central journal article supplement (PMC3145734)
Supplement: 1017352108_pnas.201017352SI.pdf [file 1017352108_pnas.201017352SI.pdf]

# Supporting Information

Maclean and Wilson 10.1073/pnas.1017352108

## SI Methods

### Using the International Union for Conservation of Nature (IUCN) Red List to Determine Extinction Risk from Rates of Population Decline.

The IUCN Red List criteria provided a means of assigning each taxon studied to a particular threat category on the basis of either extinction risk or observed or projected changes in population size over set time periods. Although the variation among species is such that it is not possible to fully validate the equivalence of the thresholds using different criteria (1), broad consistency among criteria was sought during the development of the IUCN Red List (2). It is, thus, reasonable to assume that a defined change in population size is broadly equivalent to a defined extinction probability. A taxon is critically endangered when the best available evidence indicates an observed, estimated, inferred, or suspected population size reduction of 80% over the last 10 y or three generations, whichever is longer, where the reduction or its causes may not have ceased, be understood, or be reversible. Alternatively, it is critically endangered when quantitative analysis shows that the probability of extinction in the wild is at least 50% within 10 y or three generations, whichever is longer. There are similar criteria for the other categories. A taxon is endangered if the population size reduction is 50% over 10 y or probability of extinction is 20% in 20 y, and a taxon is vulnerable if the population size reduction is 30% over 10 y or probability of extinction is 10% over 100 y.

Extinction risks can be standardized over any given period using multiple event probability theories (Eq. S1):

$$E_s = 1 - (1 - E_t)^{\frac{s}{t}}, \quad [\text{S1}]$$

where  $E_s$  is the extinction probability of the desired time period  $s$  and  $E_t$  is the extinction probability over time period  $t$ . When extinction probabilities associated with each of the three IUCN Red List categories are standardized to 55.628 y and logit transforms are applied to ensure a continuous range of values, there is a perfectly linear relationship with the equivalent population size reductions over 10 y in each of the IUCN Red List categories (Fig. S1). It is, thus, possible to infer extinction risk for any given reduction in population size over a 10-y period. To determine the population changes over 10 y ( $P_{10}$ ) from changes ( $P_t$ ) over the time period ( $t$ ) associated with each of the studies, we assumed that rates of population change remained constant through time and thus, could be calculated as follows:  $P_{10} = 1 - \exp(10r)$ , where  $r$  is the annual rate of change in population given by  $r = \ln\left(\frac{1 - P_t}{t}\right)$ .

Because there are inherent problems associated with validating the equivalence of the thresholds in different criteria (1), we tested the sensitivity of our results to a range of assumed relationships between reduction in population size and probability of extinction; the analyses presented in Fig. S1 were repeated with slope values of 12 and 15 and intercept values of  $-5$  and  $-8$ . The equivalent probabilities of extinction are given in Table S3. Even with very different extinction probability values assumed for each IUCN Red List category, our results are relatively robust, with expected extinction probabilities from climate change varying by considerably less than one order of magnitude (Table S3).

To further test the impact of the extent to which criteria and methodologies might yield dissimilar estimates of extinction risk,

we assigned all of our responses to one of three methods: (i) observed or predicted range shifts, (ii) observed or predicted changes in population size, or (iii) direct estimates of extinction risk as determined by IUCN listing or population viability analysis. Direct predictions of extinction, determined by population viability analyses, yielded higher estimates of extinction risk than estimates provided by population decline and range size (Fig. S3). However, we suspect that this finding is primarily caused by such studies focusing on particularly endangered species rather than because of a lack of equivalency among IUCN criteria

**Climate Impact Types.** The potential effects of climate impact type on extinction estimates were assessed with a generalized linear model in R software (3) using comparisons of Akaike's Information Criterion (4) with the null model of extinction risk to assess whether, overall, impact type had an effect. Responses to five impact types were considered: (i) changes in ocean circulation patterns, such as intensification of El Niño, (ii) direct responses to changes in temperature and rainfall, (iii) indirect responses caused by changes in habitat, (iv) changes in sea ice coverage resulting from temperature or precipitation change, and (v) changes in ocean acidity resulting from increased levels of  $\text{CO}_2$ . Extinction risk was affected by impact type for both observed and predicted data; temperature and rainfall change significantly affected observed responses, and changes in ocean circulation patterns, habitat, and ocean acidification significantly affected predicted responses. The majority of studies reported threats from changes in temperature and rainfall, but studies on the effects of reductions in sea ice and changes in ocean circulation patterns showed higher estimates of extinction risk (Table S2).

**Screening for Publication Bias.** We compared the relationships between extinction risk and an estimate of the number of species included in each study (Fig. S24 and B) to assess whether there was a bias to studies on species that are particularly at risk of extinction. For studies in which ecological responses were reported for more than one taxonomic group, extinction risk estimates were averaged across taxa. For studies in which ecological responses have already been observed (Fig. S24), there was no evidence of asymmetry, suggesting that no publication bias existed. For studies in which ecological responses were predicted (Fig. S2B), there is a slight tendency for studies in which more species were included to report higher extinction risks. This finding would imply a slight bias of studies on species that are at lower risk of extinction, suggesting that, overall, our estimates of extinction risk across species are conservative. We also compared the relationship between extinction risk and an estimate of the sample size per taxon of each study (Fig. S2 C and D). For both studies in which ecological responses have already been observed (Fig. S2C) and those studies in which responses were predicted (Fig. S2D), there is no evidence of asymmetry, suggesting that there was no publication bias to studies that report phenomena leading to particularly high extinction risks. The numbers in Fig. S2 refer to the study numbers listed in Table S2. One study of an observed response (5) and one study in which a prediction was made (6) reported responses equivalent to an extinction probability of very close to zero. They are, therefore, not included in Fig. S2, because the logit transform of zero is  $-\infty$ . Another study (7) predicted a definite extinction and therefore, also could not be included in the plot.

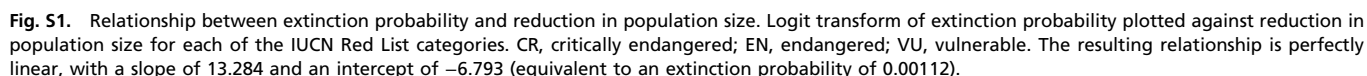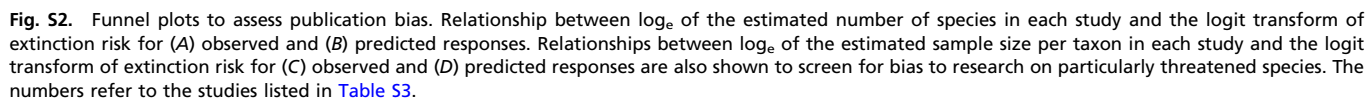

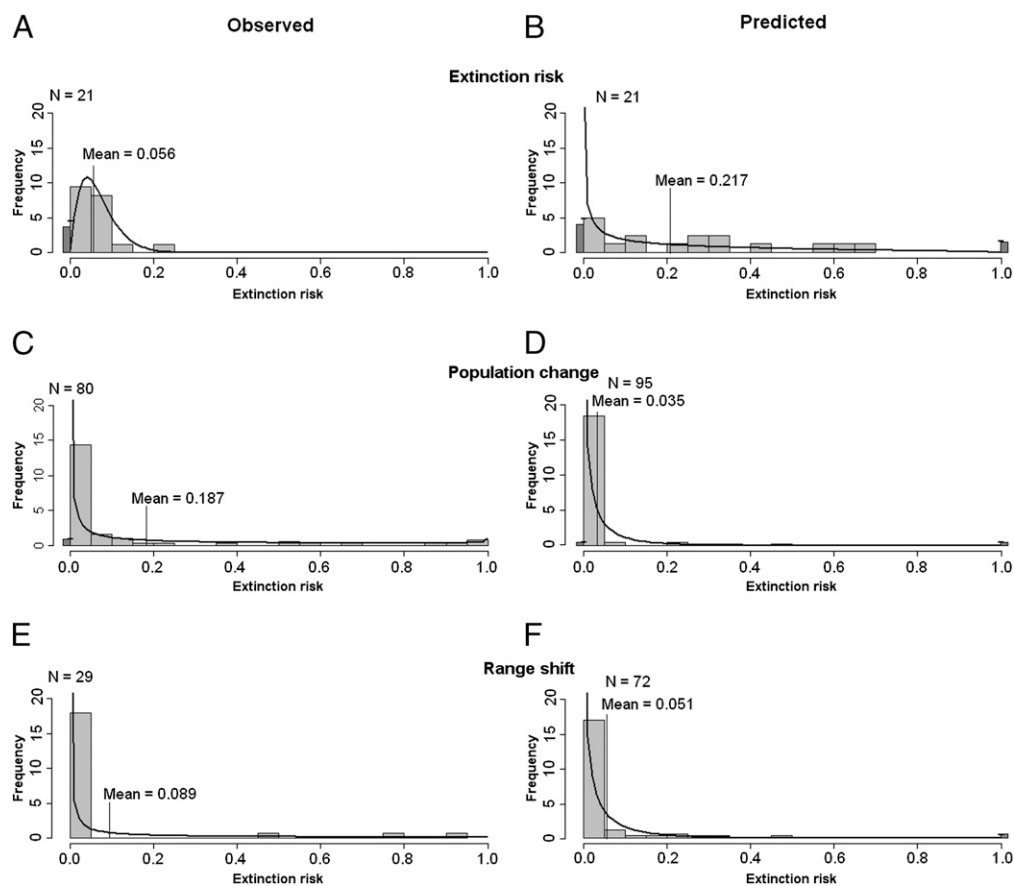

| Study*                           | Method of estimating extinction risk                                                                                               |
|----------------------------------|------------------------------------------------------------------------------------------------------------------------------------|
| Barrett et al. (1)               | Change in observed abundance                                                                                                       |
| Both et al. (2)                  | Mean associated with changes in observed abundance across sites                                                                    |
| Britton et al. (3)               | Change in observed cover                                                                                                           |
| Carpenter et al. (4)             | IUCN risk category                                                                                                                 |
| Chen et al. (5)                  | Mean associated with changes in observed abundance across sites                                                                    |
| Davies et al. (6)                | Change in observed range                                                                                                           |
| Field et al. (7)                 | Change in observed abundance since 1900                                                                                            |
| Graham et al. (8)                | Mean associated with changes in observed abundance across sites and functional groups                                              |
| Hornfeldt et al. (9)             | Estimated linear trend of observed population change                                                                               |
| Jenouvrier et al. (10)           | Estimated linear trend of observed population change                                                                               |
| Kausrud et al. (11)              | Estimated linear trend of observed population change                                                                               |
| Kausrud et al. (12)              | Estimated log-linear trend of observed population change                                                                           |
| Lovvorn et al. (13)              | Mean associated with changes in observed density at sampling points and observed change in area with suitably high prey densities  |
| Ludwig et al. (14)               | Mean associated with observed changes across sites                                                                                 |
| McEachern et al. (15)            | Mean associated with linear trends of observed post-2003 abundance across sites                                                    |
| McMenamin et al. (16)            | Change in observed number of populations                                                                                           |
| Montes-Hugo et al. (17)          | Change in observed chlorophyll-a concentrations                                                                                    |
| Mueter and Litzow (18)           | Change in observed catch per unit effort                                                                                           |
| Murphy et al. (19)               | Estimated linear trend of observed population change                                                                               |
| Pauli et al. (20)                | Change in observed number of plots occupied                                                                                        |
| Pfeifer et al. (21)              | Estimated linear trend of observed population change                                                                               |
| Rolland et al. (22)              | Estimated linear trend of observed population change                                                                               |
| Rolland et al. (23)              | Estimated linear trend of observed population change                                                                               |
| Ruhl et al. (24)                 | Estimated linear trend of observed change in density                                                                               |
| Smol et al. (25)                 | Mean associated with estimated linear regressions of observed population change across sites                                       |
| Vargas et al. (26)               | Estimated from observed change in sea-surface temperature (SST) and observed relationship between SST and change in numbers        |
| Waite and Strickland (27)        | Estimated linear trend of observed change in population as estimated by territory occupancy                                        |
| Wallisdevries and Van Swaay (28) | Mean associated with observed changes in population across species                                                                 |
| Walther et al. (29)              | Observed change in range                                                                                                           |
| Weatherhead (30)                 | Estimated linear trend of observed mean harem size                                                                                 |
| Wilson et al. (31)               | Mean associated with observed range changes across species                                                                         |
| Winder et al. (32)               | Estimated linear trend of observed change in density                                                                               |
| Anderson et al. (33)             | Estimated linear trend of predicted change in population                                                                           |
| Attorre et al. (34)              | Predicted change in range from A1F1 Intergovernmental Panel on Climate Change (IPCC) Scenario                                      |
| Baskett et al. (35)              | Proportion of presented scenarios predicting extinction                                                                            |
| Berkelmans and van Oppen (36)    | Predicted change in density; time period estimated from IPCC scenarios and mean extinction risk across scenarios used              |
| Bomhard et al. (37)              | Mean IUCN risk category across species                                                                                             |
| Carroll (38)                     | Mean associated with predicted changes in population across presented scenarios                                                    |
| Chown et al. (39)                | Predicted proportional change in density; time period estimated from IPCC scenarios and mean extinction risk across scenarios used |
| Colwell et al. (40)              | Mean associated with predicted proportion of species to go extinct across IPCC scenarios                                           |
| Dangles et al. (41)              | Predicted change in population                                                                                                     |
| Ellis et al. (42)                | Mean associated with predicted change in range (>50% probability of occurrence) across presented scenarios                         |
| Ellis et al. (43)                | Estimated change in predicted range                                                                                                |
| Feuchtmayr et al. (44)           | Predicted change in population; time period estimated from IPCC scenarios and mean extinction risk across scenarios used           |
| Fish et al. (45)                 | Mean associated with predicted change in habitat area across sites                                                                 |
| Gedan and Bertness (46)          | Predicted change in percentage cover; time period estimated from IPCC scenarios and mean extinction risk across scenarios used     |
| Gomez-Mendoza and Arriaga (47)   | Mean associated with predicted change in range across presented scenarios                                                          |
| Goulson et al. (48)              | Mean associated with predicted change in population across presented scenario.                                                     |
| Garcia-Fayos and Bochet (49)     | Mean associated with predicted change plant cover across plots                                                                     |
| Hall-Spencer et al. (50)         | Mean associated with predicted change in population with projected pH across distance bands                                        |
| Hilderbrand et al. (51)          | Mean extinction risk across bands and presented scenarios                                                                          |

Table S1. Cont.

| Study*                    | Method of estimating extinction risk                                                                                                 |
|---------------------------|--------------------------------------------------------------------------------------------------------------------------------------|
| Hollister et al. (52)     | Change in percentage cover; time period estimated from IPCC scenarios and mean extinction risk across scenarios used                 |
| Hoyle and James (53)      | Mean predicted extinction risk across presented scenarios                                                                            |
| Hughes et al. (54)        | Mean associated with predicted change in range scenarios (minor error in presented data corrected)                                   |
| Jarema et al. (55)        | Mean associated with estimates of predicted changes in density across presented scenarios                                            |
| Jensen et al. (56)        | Mean associated with predicted change in range (>0.75 probability of occurrence) across presented scenarios                          |
| Lassalle et al. (57)      | Predicted change in range                                                                                                            |
| Li et al. (58)            | Mean associated with predicted change in population across presented scenarios                                                       |
| Logan et al. (59)         | Mean associated with predicted change in percentage area at risk across years and tree types                                         |
| Malcolm et al. (60)       | Mean predicted proportion of taxa extinct across presented scenarios                                                                 |
| Marrero-Gómez et al. (61) | Taxa predicted to go extinct                                                                                                         |
| Maschinski et al. (62)    | Mean associated with predicted change in population across presented scenarios and sites                                             |
| O'Neill et al. (63)       | Predicted change in range                                                                                                            |
| Portner and Knust (64)    | Mean associated with predicted changes in population across presented scenarios                                                      |
| Raxworthy et al. (65)     | Proportion of taxa predicted to go extinct; time period estimated from IPCC scenarios and mean extinction risk across scenarios used |
| Saltz et al. (66)         | Mean predicted probability of extinction across presented scenarios                                                                  |
| Sekercioglu et al. (67)   | Mean associated with predicted change in range across presented scenarios                                                            |
| Shoo et al. (68)          | Mean proportion of taxa predicted to go extinct across presented scenarios                                                           |
| Thuiller et al. (69)      | Derived using estimated proportion in each IUCN risk category                                                                        |
| Vargas et al. (70)        | Estimate derived from predicted change in SST and relationship between SST and percentage change in numbers                          |
| Virkkala et al. (71)      | Mean associated with predicted changes in range across presented scenarios                                                           |
| Vos et al. (72)           | Mean associated with predicted changes in range across presented scenarios                                                           |
| Walker et al. (73)        | Predicted change in effect size of cover; time period estimated from IPCC scenarios and mean extinction risk across scenarios used   |

\*The study numbers in parentheses correspond to numbers shown in Fig. S2.

1. Barrett JE, Virginia RA, Wall DH, Adams BJ (2008) Decline in a dominant invertebrate species contributes to altered carbon cycling in a low-diversity soil ecosystem. *Glob Change Biol* 14:1734–1744.
2. Both C, Bouwhuis S, Lessells CM, Visser ME (2006) Climate change and population declines in a long-distance migratory bird. *Nature* 441:81–83.
3. Britton AJ, Beale CM, Towers W, Hewison RL (2009) Biodiversity gains and losses: Evidence for homogenisation of Scottish alpine vegetation. *Biol Conserv* 142:1728–1739.
4. Carpenter KE, et al. (2008) One-third of reef-building corals face elevated extinction risk from climate change and local impacts. *Science* 321:560–563.
5. Chen IC, et al. (2009) Elevation increases in moth assemblages over 42 years on a tropical mountain. *Proc Natl Acad Sci USA* 106:1479–1483.
6. Davies ZG, Wilson RJ, Brereton TM, Thomas CD (2005) The re-expansion and improving status of the silver-spotted skipper butterfly (*Hesperia comma*) in Britain: A metapopulation success story. *Biol Conserv* 124:189–198.
7. Field DB, Baumgartner TR, Charles CD, Ferreira-Bartrina V, Ohman MD (2006) Planktonic foraminifera of the California Current reflect 20th-century warming. *Science* 311:63–66.
8. Graham NAJ, et al. (2006) Dynamic fragility of oceanic coral reef ecosystems. *Proc Natl Acad Sci USA* 103:8425–8429.
9. Hörnfeldt B, Hipkiss T, Eklund U (2005) Fading out of vole and predator cycles? *Proc Biol Sci* 272:2045–2049.
10. Jenouvrier S, Weimerskirch H, Barbraud C, Park YH, Cazelles B (2005) Evidence of a shift in the cyclicity of Antarctic seabird dynamics linked to climate. *Proc Biol Sci* 272:887–895.
11. Kausrud KL, et al. (2008) Linking climate change to lemming cycles. *Nature* 456:93–97.
12. Kausrud KL, et al. (2007) Climatically driven synchrony of gerbil populations allows large-scale plague outbreaks. *Proc Biol Sci* 274:1963–1969.
13. Lovvorn JR, Grebmeier JM, Cooper LW, Bump JK, Richman SE (2009) Modeling marine protected areas for threatened eiders in a climatically changing Bering Sea. *Ecol Appl* 19:1596–1613.
14. Ludwig GX, et al. (2006) Short- and long-term population dynamical consequences of asymmetric climate change in black grouse. *Proc Biol Sci* 273:2009–2016.
15. McEachern AK, Thomson DM, Chess KA (2009) Climate alters response of an endemic island plant to removal of invasive herbivores. *Ecol Appl* 19:1574–1584.
16. McMenamin SK, Hadly EA, Wright CK (2008) Climatic change and wetland desiccation cause amphibian decline in Yellowstone National Park. *Proc Natl Acad Sci USA* 105:16988–16993.
17. Montes-Hugo M, et al. (2009) Recent changes in phytoplankton communities associated with rapid regional climate change along the western Antarctic Peninsula. *Science* 323:1470–1473.
18. Mueter FJ, Litow MA (2008) Sea ice retreat alters the biogeography of the Bering Sea continental shelf. *Ecol Appl* 18:309–320.
19. Murphy EJ, et al. (2007) Climatically driven fluctuations in Southern Ocean ecosystems. *Proc Biol Sci* 274:3057–3067.
20. Pauli H, Gottfried M, Reier K, Klettner C, Grabherr G (2007) Signals of range expansions and contractions of vascular plants in the high Alps: Observations (1994–2004) at the GLORIA\*master site Schrankogel, Tyrol, Austria. *Glob Change Biol* 13:147–156.
21. Pfeifer M, Wiegand K, Heinrich W, Jetschke G (2006) Long-term demographic fluctuations in an orchid species driven by weather: Implications for conservation planning. *J Appl Ecol* 43:313–324.
22. Rolland V, Barbraud C, Weimerskirch H (2008) Combined effects of fisheries and climate on a migratory long-lived marine predator. *J Appl Ecol* 45:4–13.
23. Rolland V, Nevoux M, Barbraud C, Weimerskirch H (2009) Respective impact of climate and fisheries on the growth of an albatross population. *Ecol Appl* 19:1336–1346.
24. Ruhl HA, Ellena JA, Smith KL Jr. (2008) Connections between climate, food limitation, and carbon cycling in abyssal sediment communities. *Proc Natl Acad Sci USA* 105:17006–17011.
25. Smol JP, et al. (2005) Climate-driven regime shifts in the biological communities of arctic lakes. *Proc Natl Acad Sci USA* 102:4397–4402.
26. Vargas FH, Harrison S, Rea S, Macdonald DW (2006) Biological effects of El Niño on the Galapagos penguin. *Biol Conserv* 127:107–114.
27. Waite TA, Strickland D (2006) Climate change and the demographic demise of a hoarding bird living on the edge. *Proc Biol Sci* 273:2809–2813.
28. WallisdeVries MF, Van Swaay CAM (2006) Global warming and excess nitrogen may induce butterfly decline by microclimatic cooling. *Glob Change Biol* 12:1620–1626.
29. Walther GR, Berger S, Sykes MT (2005) An ecological ‘footprint’ of climate change. *Proc R Soc Lond B Biol Sci* 272:1427–1432.
30. Weatherhead PJ (2005) Long-term decline in a red-winged blackbird population: Ecological causes and sexual selection consequences. *Proc Biol Sci* 272:2313–2317.
31. Wilson RJ, et al. (2005) Changes to the elevational limits and extent of species ranges associated with climate change. *Ecol Lett* 8:1138–1146.

32. Winder M, Reuter JE, Schladow SG (2009) Lake warming favours small-sized planktonic diatom species. *Proc Biol Sci* 276:427–435.
33. Anderson BJ, et al. (2009) Dynamics of range margins for metapopulations under climate change. *Proc Biol Sci* 276:1415–1420.
34. Attorre F, et al. (2007) Will dragonblood survive the next period of climate change? Current and future potential distribution of *Dracaena cinnabari* (Socotra, Yemen). *Biol Conserv* 138:430–439.
35. Baskett ML, Gaines SD, Nisbet RM (2009) Symbiont diversity may help coral reefs survive moderate climate change. *Ecol Appl* 19:3–17.
36. Borkelmans R, van Oppen MJH (2006) The role of zooxanthellae in the thermal tolerance of corals: A 'nugget of hope' for coral reefs in an era of climate change. *Proc R Soc Lond B Biol Sci* 273:2305–2312.
37. Bomhard B, et al. (2005) Potential impacts of future land use and climate change on the Red List status of the Proteaceae in the Cape Floristic Region, South Africa. *Glob Change Biol* 11:1452–1468.
38. Carroll C (2007) Interacting effects of climate change, landscape conversion, and harvest on carnivore populations at the range margin: Marten and lynx in the northern Appalachians. *Conserv Biol* 21:1092–1104.
39. Chown SL, Slabber S, McGeogh MA, Janion C, Leinaas HP (2009) Phenotypic plasticity mediates climate change responses among invasive and indigenous arthropods. *Proc R Soc Lond B Biol Sci* 274:2531–2537.
40. Colwell RK, Brehm G, Cardelús CL, Gilman AC, Longino JT (2008) Global warming, elevational range shifts, and lowland biotic attrition in the wet tropics. *Science* 322:258–261.
41. Dangles O, Carpio C, Barragan AR, Zeddam JL, Silvain JF (2008) Temperature as a key driver of ecological sorting among invasive pest species in the tropical Andes. *Ecol Appl* 18:1795–1809.
42. Ellis CJ, Coppins BJ, Dawson TP (2007) Predicted response of the lichen epiphyte *Lecanora populicola* to climate change scenarios in a clean-air region of Northern Britain. *Biol Conserv* 135:396–404.
43. Ellis CJ, Coppins BJ, Dawson TP, Seaward MRD (2007) Response of British lichens to climate change scenarios: Trends and uncertainties in the projected impact for contrasting biogeographic groups. *Biol Conserv* 140:217–235.
44. Feuchtmayr H, et al. (2009) Global warming and eutrophication: Effects on water chemistry and autotrophic communities in experimental hypertrophic shallow lake mesocosms. *J Appl Ecol* 46:713–723.
45. Fish MR, et al. (2005) Predicting the impact of sea-level rise on Caribbean Sea Turtle nesting habitat. *Conserv Biol* 19:482–491.
46. Gedan KB, Bertness MD (2009) Experimental warming causes rapid loss of plant diversity in New England salt marshes. *Ecol Lett* 12:842–848.
47. Gómez-Mendoza L, Arriaga L (2007) Modeling the effect of climate change on the distribution of oak and pine species of Mexico. *Conserv Biol* 21:1545–1555.
48. Goulson D, Derwent LC, Hanley ME, Dunn DW, Abolins SR (2005) Predicting calyptate fly populations from the weather, and probable consequences of climate change. *J Appl Ecol* 42:795–804.
49. Garcia-Fayos P, Bochet E (2009) Indication of antagonistic interaction between climate change and erosion on plant species richness and soil properties in semiarid Mediterranean ecosystems. *Glob Change Biol* 15:306–318.
50. Hall-Spencer JM, et al. (2008) Volcanic carbon dioxide vents show ecosystem effects of ocean acidification. *Nature* 454:96–99.
51. Hilderbrand RH, Gardner RH, Ratnaswamy MJ, Keller CE (2007) Evaluating population persistence of *Delmarva* fox squirrels and potential impacts of climate change. *Biol Conserv* 137:70–77.
52. Hollister RD, Webber PJ, Tweedie CE (2005) The response of Alaskan arctic tundra to experimental warming: Differences between short- and long-term responses. *Glob Change Biol* 11:525–536.
53. Hoyle M, James M (2005) Global warming, human population pressure, and viability of the world's smallest butterfly. *Conserv Biol* 19:1113–1124.
54. Hughes GO, Thuiller W, Midgley GF, Collins K (2008) Environmental change hastens the demise of the critically endangered riverine rabbit (*Bunolagus monticoularis*). *Biol Conserv* 141:23–34.
55. Jarema SI, Samson J, McGill BJ, Humphries MM (2009) Variation in abundance across a species' range predicts climate change responses in the range interior will exceed those at the edge: A case study with North American beaver. *Glob Change Biol* 15:508–522.
56. Jensen RA, et al. (2008) Prediction of the distribution of Arctic-nesting pink-footed geese under a warmer climate scenario. *Glob Change Biol* 14:1–10.
57. Lassalle G, Beguer M, Beaulaton L, Rochard E (2008) Diadromous fish conservation plans need to consider global warming issues: An approach using biogeographical models. *Biol Conserv* 141:1105–1118.
58. Li J, Hilbert DW, Parker T, Williams S (2009) How do species respond to climate change along an elevation gradient? A case study of the grey-headed robin (*Heteromyias albispecularis*). *Glob Change Biol* 15:255–267.
59. Logan JA, Régnière J, Gray DR, Munson AS (2007) Risk assessment in the face of a changing environment: Gypsy moth and climate change in Utah. *Ecol Appl* 17:101–117.
60. Malcolm JR, Liu CR, Neilson RP, Hansen L, Hannah L (2006) Global warming and extinctions of endemic species from biodiversity hotspots. *Conserv Biol* 20:538–548.
61. Marrero-Gómez MV, Oostermeijer JGB, Carqué-Álamo E, Bañares-Baudet Á (2007) Population viability of the narrow endemic *Helianthemum juliae* (CISTACEAE) in relation to climate variability. *Biol Conserv* 136:552–562.
62. Maschinski J, Baggs JE, Quintana-Ascencio PF, Menges ES (2006) Using population viability analysis to predict the effects of climate change on the extinction risk of an endangered limestone endemic shrub, Arizona cliffrose. *Conserv Biol* 20:218–228.
63. O'Neill GA, Hamann A, Wang TL (2008) Accounting for population variation improves estimates of the impact of climate change on species' growth and distribution. *J Appl Ecol* 45:1040–1049.
64. Pörtner HO, Knust R (2007) Climate change affects marine fishes through the oxygen limitation of thermal tolerance. *Science* 315:95–97.
65. Raxworthy CJ, et al. (2008) Extinction vulnerability of tropical montane endemism from warming and upslope displacement: A preliminary appraisal for the highest massif in Madagascar. *Glob Change Biol* 14:1703–1720.
66. Saltz D, Rubenstein DI, White GC (2006) The impact of increased environmental stochasticity due to climate change on the dynamics of asiatic wild ass. *Conserv Biol* 20:1402–1409.
67. Sekercioglu CH, Schneider SH, Fay JP, Loarie SR (2008) Climate change, elevational range shifts, and bird extinctions. *Conserv Biol* 22:140–150.
68. Shoo LP, Williams SE, Hero JM (2005) Climate warming and the rainforest birds of the Australian Wet Tropics: Using abundance data as a sensitive predictor of change in total population size. *Biol Conserv* 125:335–343.
69. Thuiller W, Lavorel S, Araújo MB, Sykes MT, Prentice IC (2005) Climate change threats to plant diversity in Europe. *Proc Natl Acad Sci USA* 102:8245–8250.
70. Vargas FH, et al. (2007) Modelling the effect of El Niño on the persistence of small populations: The Galapagos penguin as a case study. *Biol Conserv* 137:138–148.
71. Virkkala R, Heikkinen RK, Leikola N, Luoto M (2008) Projected large-scale range reductions of northern-boreal land bird species due to climate change. *Biol Conserv* 141:1343–1353.
72. Vos CC, et al. (2008) Adapting landscapes to climate change: Examples of climate-proof ecosystem networks and priority adaptation zones. *J Appl Ecol* 45:1722–1731.
73. Walker MD, et al. (2006) Plant community responses to experimental warming across the tundra biome. *Proc Natl Acad Sci USA* 103:1342–1346.

**Table S2. Effects of climate change impact type on expected extinction probability estimates**

|                                       | Estimate (–SE to +SE)            |                                  | Sample size |           |
|---------------------------------------|----------------------------------|----------------------------------|-------------|-----------|
|                                       | Observed                         | Predicted                        | Observed    | Predicted |
| Changes in ocean circulation patterns | 0.196* (0.085–0.393)             | 0.637 <sup>†</sup> (0.404–0.820) | 3           | 1         |
| Temperature and rainfall change       | 0.116 <sup>‡</sup> (0.060–0.211) | 0.045* (0.021–0.096)             | 92          | 178       |
| Responses to habitat change           | 0.225* (0.121–0.379)             | 0.275 <sup>§</sup> (0.107–0.545) | 29          | 2         |
| Changes in sea ice coverage           | 0.308* (0.213–0.423)             | —                                | 6           | 0         |
| Changes in ocean acidity              | —                                | 0.042 <sup>†</sup> (0.028–0.062) | 0           | 1         |

\*Not significant.

<sup>†</sup> $P < 0.001$ .<sup>‡</sup> $P < 0.05$ .<sup>§</sup> $P < 0.01$ .

**Table S3. Estimates of expected extinction probabilities for a range of relationships between reductions in population size and extinction probabilities**

| Scenario | Decline* |     |     | Extinction probability <sup>†</sup> |       |       | Slope* | Intercept <sup>†</sup> | Mean extinction risk of observed responses | Mean extinction risk of predicted responses |
|----------|----------|-----|-----|-------------------------------------|-------|-------|--------|------------------------|--------------------------------------------|---------------------------------------------|
|          | CR       | EN  | VU  | CR                                  | EN    | VU    |        |                        |                                            |                                             |
| Actual   | 0.8      | 0.5 | 0.3 | 0.500                               | 0.200 | 0.100 | 13.284 | -6.79251               | 0.147                                      | 0.067                                       |
| 2        | 0.8      | 0.5 | 0.3 | 0.637                               | 0.480 | 0.426 | 13.284 | -5.00000               | 0.238                                      | 0.143                                       |
| 3        | 0.8      | 0.5 | 0.3 | 0.384                               | 0.079 | 0.032 | 13.284 | -8.00000               | 0.101                                      | 0.048                                       |
| 4        | 0.8      | 0.5 | 0.3 | 0.403                               | 0.126 | 0.070 | 12.000 | -6.79251               | 0.120                                      | 0.058                                       |
| 5        | 0.8      | 0.5 | 0.3 | 0.563                               | 0.376 | 0.327 | 12.000 | -5.00000               | 0.212                                      | 0.121                                       |
| 6        | 0.8      | 0.5 | 0.3 | 0.274                               | 0.045 | 0.022 | 12.000 | -8.00000               | 0.076                                      | 0.045                                       |
| 7        | 0.8      | 0.5 | 0.3 | 0.608                               | 0.329 | 0.159 | 15.000 | -6.79251               | 0.184                                      | 0.084                                       |
| 8        | 0.8      | 0.5 | 0.3 | 0.716                               | 0.604 | 0.574 | 15.000 | -5.00000               | 0.272                                      | 0.174                                       |
| 9        | 0.8      | 0.5 | 0.3 | 0.514                               | 0.157 | 0.052 | 15.000 | -8.00000               | 0.135                                      | 0.055                                       |

IUCN categories: CR, critically endangered; EN, endangered; VU, vulnerable.

\*All declines are over 10 y.

<sup>†</sup>Extinction risk period varies by category (CR = 10 y, EN = 20 y, and VU = 100 y).
